# Supplementary material for: Gene panel for Mendelian strokes
Source: PubMed Central journal article supplement — Stroke Vasc Neurol. 2020 Apr 26;5(4):416–21. doi: 10.1136/svn-2020-000352 (PMC7804056; doi:10.1136/svn-2020-000352), 2020-04-26
Supplement: svn-2020-000352supp001.pdf [file svn-2020-000352supp001.pdf]

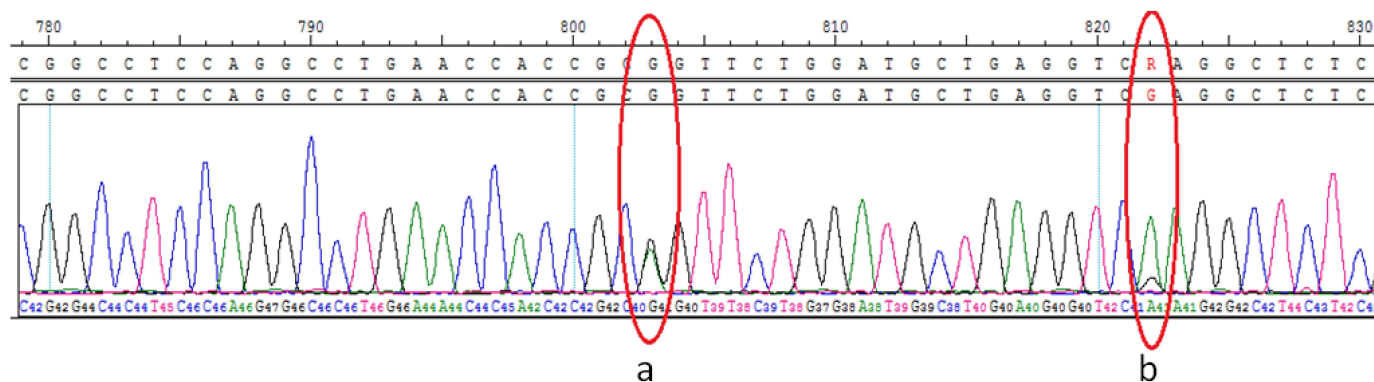

Figure S1 A common SNP (rs199685642) with a homozygous alternative-allele genotype (AA) was found in the panel and Sanger sequencing at one locus (*PKD1* c.1138C>T, p.R380C).

a: chr16-2167855, *PKD1* c.1138C>T, p.R380C

b: SNP (rs199685642) was identified as a homozygous mutation by NGS and Sanger sequencing. The black curve under the green peak was regarded as noise.
