# Supplementary material for: Gene panel for Mendelian strokes
Source: PubMed Central journal article supplement — Stroke Vasc Neurol. 2020 Apr 26;5(4):416–21. doi: 10.1136/svn-2020-000352 (PMC7804056; doi:10.1136/svn-2020-000352), 2020-04-26
Supplement: svn-2020-000352supp002.pdf [file svn-2020-000352supp002.pdf]

| <b>Table S1 Literature Review Form</b>                   |                                                                                                                                                |                                                          |                            |  |
|----------------------------------------------------------|------------------------------------------------------------------------------------------------------------------------------------------------|----------------------------------------------------------|----------------------------|--|
| <b>Literature Review Form</b>                            |                                                                                                                                                |                                                          |                            |  |
| <b>Reviewer</b>                                          |                                                                                                                                                | No.                                                      |                            |  |
| <b>Title</b>                                             |                                                                                                                                                |                                                          |                            |  |
| <b>Authors</b>                                           |                                                                                                                                                |                                                          |                            |  |
| <b>Country</b>                                           |                                                                                                                                                |                                                          |                            |  |
| <b>Citation</b><br>[Journal, Year; volume (issue); Page] |                                                                                                                                                |                                                          |                            |  |
| <b>Methods</b>                                           | <input type="checkbox"/> Case Report <input type="checkbox"/> Family Study <input type="checkbox"/> GWAS <input type="checkbox"/> Other: _____ |                                                          |                            |  |
| <b>Selection</b>                                         | Reported a causal mutation for cerebrovascular disease:                                                                                        | <input type="checkbox"/> Yes <input type="checkbox"/> No |                            |  |
|                                                          | Described the detailed phenotype of the patients:                                                                                              | <input type="checkbox"/> Yes <input type="checkbox"/> No |                            |  |
|                                                          | Contained functional verification or prediction for the mutations:                                                                             | <input type="checkbox"/> Yes <input type="checkbox"/> No |                            |  |
| <b>Study Objects</b>                                     | <input type="checkbox"/> Patients <input type="checkbox"/> Animal objects                                                                      |                                                          |                            |  |
| <b>Results</b>                                           | Sample size                                                                                                                                    |                                                          | Participants included, No: |  |
|                                                          | Demographic characteristics (Ethnicity)                                                                                                        |                                                          |                            |  |
|                                                          | Diseases (%)                                                                                                                                   |                                                          |                            |  |
|                                                          | Exposure (Genetic mutations)                                                                                                                   | Gene:                                                    |                            |  |
|                                                          |                                                                                                                                                | Type of Mutation:                                        |                            |  |
