# Supplementary material for: Gene panel for Mendelian strokes
Source: PubMed Central journal article supplement — Stroke Vasc Neurol. 2020 Apr 26;5(4):416–21. doi: 10.1136/svn-2020-000352 (PMC7804056; doi:10.1136/svn-2020-000352), 2020-04-26
Supplement: svn-2020-000352supp003.pdf [file svn-2020-000352supp003.pdf]

Table S2 Pathogenic/likely pathogenic/VUS mutations detected in our cohort

| Case No. | Gene          | Chromosome position | Nucleotide change | Protein change | Heterozygosity | First interpretation of variants | Second interpretation of variants |                      |                  |      |                           |
|----------|---------------|---------------------|-------------------|----------------|----------------|----------------------------------|-----------------------------------|----------------------|------------------|------|---------------------------|
|          |               |                     |                   |                |                |                                  | Mutation                          | Evidence of mutation | Reference (PMID) | HGMD | Reported diseases         |
| 2        | <i>RYR1</i>   | chr19-38931428      | c.89A>G           | p.E30G         | Het            | VUS                              |                                   |                      | -                | -    | -                         |
|          | <i>RYR1</i>   | chr19-38987554      | c.6851A>G         | p.N2284S       | Het            | VUS                              |                                   |                      | -                | -    | -                         |
| 3        | <i>SCN5A</i>  | chr3-38592648       | c.5215C>T         | p.R1739W       | Het            | Pathogenic                       | VUS                               | PP2; PP3             | 19716085         | DM   | Long QT syndrome          |
|          | <i>KCNQ1</i>  | chr11-2604728       | c.985G>A          | p.A329T        | Het            | VUS                              |                                   |                      | -                | -    | -                         |
| 4        | <i>ABCA1</i>  | chr9-107558696      | c.5131G>A         | p.V1711I       | Het            | VUS                              |                                   |                      | -                | -    | -                         |
| 5        | <i>NKX2-5</i> | chr5-172659699      | c.848C>A          | p.P283Q        | Het            | Pathogenic                       |                                   |                      | 21110066         | DM   | Ventricular septal defect |
|          | <i>MYH11</i>  | chr16-15932077      | c.33G>T           | p.E11D         | Het            | Likely pathogenic                |                                   |                      | 30056620         | DM?  | Aortic dissection, acute  |
|          | <i>MYLK</i>   | chr3-123339135      | c.5287A>C         | p.M1763L       | Het            | VUS                              |                                   |                      | -                | -    | -                         |
| 6        | <i>APP</i>    | chr21-27264120      | c.2125G>A         | p.G709S        | Het            | VUS                              |                                   |                      | -                | -    | -                         |
|          | <i>PKD1</i>   | chr16-2156408       | c.7480G>A         | p.E2494K       | Het            | Likely pathogenic                |                                   |                      | 27567292         | DM?  | Intracranial aneurysms    |
| 7        | <i>NOTCH3</i> | chr19-15297982      | c.1774C>T         | p.R592C        | Het            | Pathogenic                       | Likely pathogenic                 | PS3; PM2; PP3        | 19488902         | DM   | CADASIL                   |
| 8        | <i>RNF213</i> | chr17-78358903      | c.14387A>G        | p.K4796R       | Het            | VUS                              |                                   |                      | -                | -    | -                         |
|          | <i>RBM20</i>  | chr10-112544565     | c.1445T>C         | p.L482P        | Het            | VUS                              |                                   |                      | -                | -    | -                         |

|           |               |                 |            |                 |     |            |                   |           |          |     |                                            |
|-----------|---------------|-----------------|------------|-----------------|-----|------------|-------------------|-----------|----------|-----|--------------------------------------------|
|           | <i>RBM20</i>  | chr10-112572206 | c.2051G>A  | p.R684K         | Het | VUS        |                   |           | -        | -   | -                                          |
| <b>9</b>  | <i>NOTCH3</i> | chr19-15291543  | c.3091C>T  | p.R1031C        | Het | Pathogenic | VUS               | PM2; PP2  | 9388399  | DM  | CADASIL                                    |
|           | <i>PKD1</i>   | chr16-2140803   | c.12010C>T | p.Q4004*        | Het | Pathogenic | VUS               | PVS1; PP2 | 16456780 | DM  | Polycystic kidney disease 1                |
| <b>10</b> | <i>PSEN1</i>  | chr14-73664777  | c.808A>T   | p.M270L         | Het | VUS        |                   |           | -        | -   | -                                          |
|           | <i>MTHFR</i>  | chr1-11856378   | c.665C>T   | p.A222V         | Hom | VUS        |                   |           | 7647779  | DFP | Cardiovascular disease, association with   |
| <b>11</b> | <i>MTHFR</i>  | chr1-11856378   | c.665C>T   | p.A222V         | Hom | VUS        |                   |           | 7647779  | DFP | Cardiovascular disease, association with   |
| <b>12</b> | <i>MYH9</i>   | chr22-36681204  | c.5446A>G  | p.I1816V        | Het | Pathogenic | VUS               | PS3       | 12533692 | DM  | Alport syndrome with macrothrombocytopenia |
|           | <i>NOTCH3</i> | chr19-15296391  | c.2051C>T  | p.P684L         | Het | VUS        |                   |           | -        | -   | -                                          |
|           | <i>APOA5</i>  | chr11-116662359 | c.104G>A   | p.S35N          | Het | VUS        |                   |           | -        | -   | -                                          |
| <b>13</b> | <i>MYLK</i>   | chr3-123366135  | c.4555C>A  | p.P1519T<br>Het | Het | VUS        |                   |           | -        | -   | -                                          |
|           | <i>RYR2</i>   | chr1-237850803  | c.9066T>G  | p.F3022L        | Het | VUS        |                   |           | -        | -   | -                                          |
| <b>14</b> | <i>MTHFR</i>  | chr1-11856378   | c.665C>T   | p.A222V         | Hom | VUS        |                   |           | 7647779  | DFP | Cardiovascular disease, association with   |
| <b>15</b> | <i>LDLR</i>   | chr19-11217364  | c.817+1G>C | splicing site   | Het | Pathogenic | Likely pathogenic | PVS1; PM2 | -        | -   | -                                          |
|           | <i>MTHFR</i>  | chr1-11856378   | c.665C>T   | p.A222V         | Hom | VUS        |                   |           | 7647779  | DFP | Cardiovascular disease, association with   |

|    |               |                 |             |               |     |                   |                   |           |          |                                          |                                                |
|----|---------------|-----------------|-------------|---------------|-----|-------------------|-------------------|-----------|----------|------------------------------------------|------------------------------------------------|
| 16 | <i>COL4A2</i> | chr13-111080914 | c.461G>A    | p.G154E       | Het | VUS               |                   |           |          |                                          |                                                |
|    | <i>ITGA2B</i> | chr17-42453087  | c.2602-3C>A | splicing site | Het | Pathogenic        |                   | 25373348  | DM       | Glanzmann thrombasthenia                 |                                                |
| 17 | <i>FBNI</i>   | chr15-48780424  | c.3223C>T   | p.R1075C      | Het | VUS               |                   |           |          |                                          |                                                |
|    | <i>MTHFR</i>  | chr1-11856378   | c.665C>T    | p.A222V       | Hom | VUS               |                   | 7647779   | DFP      | Cardiovascular disease, association with |                                                |
| 18 | <i>ABCC6</i>  | chr16-16244099  | c.4404-1G>A | splicing site | Het | Likely pathogenic | Likely pathogenic | PVS1; PM2 |          |                                          |                                                |
|    | <i>NOTCH3</i> | chr19-15292616  | c.2567-4G>A | splicing site | Het | VUS               |                   |           |          |                                          |                                                |
|    | <i>MTHFR</i>  | chr1-11856378   | c.665C>T    | p.A222V       | Hom | VUS               |                   | 7647779   | DFP      | Cardiovascular disease, association with |                                                |
| 19 | <i>PCNT</i>   | chr21-47847639  | c.7424G>A   | p.R2475Q      | Het | VUS               |                   |           |          |                                          |                                                |
|    | <i>PCNT</i>   | chr21-47817349  | c.4387C>A   | p.L1463M      | Het | VUS               |                   |           |          |                                          |                                                |
| 21 | <i>VWF</i>    | chr12-6128749   | c.3835G>A   | p.V1279I      | Het | Likely pathogenic | VUS               | PM2; PP2  | 8096943  | DM?                                      | Von Willebrand disease 1                       |
|    | <i>VWF</i>    | chr12-6128787   | c.3797C>T   | p.P1266L      | Het | Pathogenic        | VUS               | PM2; PP2  | 8486782  | DM                                       | Von Willebrand disease 1                       |
| 22 | <i>APOA5</i>  | chr11-116660852 | c.1093G>A   | p.D365N       | Het | VUS               |                   |           |          |                                          |                                                |
|    | <i>MTHFR</i>  | chr1-11863038   | c.136C>T    | p.R46W        | Het | Pathogenic        | VUS               | PS3; PP2  | 25736335 | DM                                       | Methylenetetrahydrofolate reductase deficiency |
|    | <i>MTHFR</i>  | chr1-11856378   | c.665C>T    | p.A222V       | Het | VUS               |                   |           | 7647779  | DFP                                      | Cardiovascular disease, association with       |
| 23 | <i>PKDI</i>   | chr16-2167855   | c.1138C>T   | p.R380C       | Het | Likely pathogenic | VUS               | PP2; PP3  | 27835667 | DM?                                      | Polycystic kidney disease 1                    |

|           |               |                       |                   |             |     |                   |     |     |          |     |                                               |
|-----------|---------------|-----------------------|-------------------|-------------|-----|-------------------|-----|-----|----------|-----|-----------------------------------------------|
|           | <i>MTHFR</i>  | chr1-11856378         | c.665C>T          | p.A222V     | Hom | VUS               |     |     | 7647779  | DFP | Cardiovascular disease, association with      |
| <b>24</b> | <i>KRIT1</i>  | chr7-91855885         | c.1101delT        | p.H367Qfs*4 | Het | Likely pathogenic | VUS | PM2 | -        | -   | -                                             |
| <b>25</b> | <i>ETV6</i>   | chr12-12038953        | c.1246T>A         | p.L416M     | Het | VUS               |     |     | -        | -   | -                                             |
|           | <i>MYH11</i>  | chr16-15826512        | c.3560C>T         | p.T1187M    | Het | VUS               |     |     | -        | -   | -                                             |
| <b>26</b> | <i>MTHFR</i>  | chr1-11856378         | c.665C>T          | p.A222V     | Hom | VUS               |     |     | 7647779  | DFP | Cardiovascular disease, association with      |
| <b>27</b> | <i>HBB</i>    | chr11-5247993-5247996 | c.126_129 delCTTT | p.F42Lfs*19 | Het | Pathogenic        |     |     | 6826539  | DM  | Thalassaemia beta                             |
|           | <i>RYR2</i>   | chr1-237732463        | c.3442G>T         | p.G1148C    | Het | VUS               |     |     | -        | -   | -                                             |
| <b>29</b> | <i>PRNP</i>   | chr20-4680156         | c.290G>A          | p.S97N      | Het | Pathogenic        |     |     | -        | DM  | Dementia, HGOL                                |
| <b>30</b> | <i>MTHFR</i>  | chr1-11856378         | c.665C>T          | p.A222V     | Hom | VUS               |     |     | 7647779  | DFP | Cardiovascular disease, association with      |
|           | <i>ABCC6</i>  | chr16-16263555        | c.2943G>T         | p.Q981H     | Het | Pathogenic        |     |     | 18157818 | DM  | Pseudoxanthoma elasticum, autosomal recessive |
| <b>31</b> | <i>MTHFR</i>  | chr1-11856378         | c.665C>T          | p.A222V     | Hom | VUS               |     |     | 7647779  | DFP | Cardiovascular disease, association with      |
| <b>32</b> | <i>GSN</i>    | chr9-124073043        | c.586C>T          | p.R196C     | Het | VUS               |     |     | -        | -   | -                                             |
|           | <i>MTHFR</i>  | chr1-11856378         | c.665C>T          | p.A222V     | Hom | VUS               |     |     | 7647779  | DFP | Cardiovascular disease, association with      |
| <b>33</b> | <i>COL5A1</i> | chr9-137710541        | c.4270C>T         | p.P1424S    | Het | VUS               |     |     | -        | -   | -                                             |
| <b>34</b> | <i>NOS3</i>   | chr7-150704216        | c.1964G>A         | p.R655Q     | Het | VUS               |     |     | -        | -   | -                                             |
|           | <i>PSEN2</i>  | chr1-227069609        | c.1A>G            | p.0?        | Het | VUS               |     |     | -        | -   | -                                             |

|    |                 |                |             |               |     |                   |                   |           |          |                |                                           |
|----|-----------------|----------------|-------------|---------------|-----|-------------------|-------------------|-----------|----------|----------------|-------------------------------------------|
|    | <i>SERPIND1</i> | chr22-21138287 | c.919delA   | p.M307*       | Het | Likely pathogenic | VUS               | PVS1; PM2 | -        | -              | -                                         |
| 35 | <i>MYLK</i>     | chr3-123366171 | c.4519C>T   | p.R1507W      | Het | VUS               |                   |           | -        | -              | -                                         |
|    | <i>SCN5A</i>    | chr3-38592108  | c.5755C>T   | p.R1919C      | Het | VUS               |                   |           | -        | -              | -                                         |
|    | <i>MTHFR</i>    | chr1-11856378  | c.665C>T    | p.A222V       | Hom | VUS               |                   |           | 7647779  | DFP            | Cardiovascular disease, association with  |
|    | <i>MTHFR</i>    | chr1-11854002  | c.1492G>A   | p.V498M       | Het | VUS               |                   |           | -        | -              | -                                         |
| 36 | <i>FBNI</i>     | chr15-48829846 | c.698G>A    | p.R233H       | Het | Pathogenic        | VUS               | PP3       | 26272055 | DM             | Thoracic aortic aneurysms and dissections |
| 37 | <i>NOTCH3</i>   | chr19-15299809 | c.1369T>C   | p.C457R       | Het | VUS               |                   |           | -        | -              | -                                         |
| 39 | <i>MYH11</i>    | chr16-15808938 | c.5614G>A   | p.A1872T      | Het | VUS               |                   |           | -        | -              | -                                         |
|    | <i>MTHFR</i>    | chr1-11856378  | c.665C>T    | p.A222V       | Hom | VUS               |                   |           | 7647779  | DFP            | Cardiovascular disease, association with  |
| 40 | <i>PROS1</i>    | chr3-93605275  | c.1228C>A   | p.P410T       | Het | VUS               |                   |           | -        | -              | -                                         |
|    | <i>RNF213</i>   | chr17-78358945 | c.14429G>A  | p.R4810K      | Het | VUS               |                   |           | 21048783 | Susceptibility | Moyamoya disease                          |
| 41 | <i>ABCC6</i>    | chr16-16244099 | c.4404-1G>A | splicing site | Het | Likely pathogenic | Likely pathogenic | PVS1; PM2 | -        | -              | -                                         |
|    | <i>JAK2</i>     | chr9-5072559   | c.1709A>G   | p.Y570C       | Het | VUS               |                   |           | -        | -              | -                                         |
|    | <i>MTHFR</i>    | chr1-11856378  | c.665C>T    | p.A222V       | Hom | VUS               |                   |           | 7647779  | DFP            | Cardiovascular disease, association with  |
| 42 | <i>COL1A2</i>   | chr7-94037528  | c.673G>C    | p.V225L       | Het | VUS               |                   |           | -        | -              | -                                         |
|    | <i>MTHFR</i>    | chr1-11856378  | c.665C>T    | p.A222V       | Hom | VUS               |                   |           | 7647779  | DFP            | Cardiovascular disease, association with  |

|    |               |                 |            |          |     |            |     |         |          |    |                                          |
|----|---------------|-----------------|------------|----------|-----|------------|-----|---------|----------|----|------------------------------------------|
| 43 | <i>RYR1</i>   | chr19-39039020  | c.12242C>T | p.T4081M | Het | Pathogenic | VUS | PP2     | 16917943 | DM | Malignant hyperthermia                   |
|    | <i>THBD</i>   | chr20-23029313  | c.829G>T   | p.G277W  | Het | VUS        |     |         | -        | -  | -                                        |
| 44 | <i>RNF213</i> | chr17-78313166  | c.4999G>A  | p.G1667R | Het | VUS        |     |         | -        | -  | -                                        |
|    | <i>MTHFR</i>  | chr1-11856378   | c.665C>T   | p.A222V  | Hom | VUS        |     | 7647779 | DFP      |    | Cardiovascular disease, association with |
| 45 | <i>MTHFR</i>  | chr1-11856378   | c.665C>T   | p.A222V  | Hom | VUS        |     | 7647779 | DFP      |    | Cardiovascular disease, association with |
| 46 | <i>MTHFR</i>  | chr1-11856378   | c.665C>T   | p.A222V  | Hom | VUS        |     | 7647779 | DFP      |    | Cardiovascular disease, association with |
|    | <i>HTRA1</i>  | chr10-124221572 | c.404C>A   | p.A135D  | Het | VUS        |     |         |          |    |                                          |

DM, disease causing mutation; DFP, disease-associated polymorphism with additional supporting functional evidence; Het, heterogeneous mutation; Hom, homogenous mutation; PM, the weight of pathogenicity criteria is moderate; PM2, absent from controls (or at extremely low frequency if recessive) in Exome Sequencing Project, 1000 Genomes Project, or Exome Aggregation Consortium; PP, the weight of pathogenicity criteria is supporting; PP2, missense variant in a gene that has a low rate of benign missense variation and in which missense variants are a common mechanism of disease; PP3, multiple lines of computational evidence support a deleterious effect on the gene or gene product (conservation, evolutionary, splicing impact, etc.); PS, the weight of pathogenicity criteria is strong; PS3, well-established in vitro or in vivo functional studies supportive of a damaging effect on the gene or gene product; PVS, the weight of pathogenicity criteria is very strong; PVS1, null variant (nonsense, frameshift, canonical  $\pm 1$  or 2 splice sites, initiation codon, single or multiexon deletion) in a gene where LOF is a known mechanism of disease; VUS, variants of uncertain significance.
