# Supplementary material for: Gene panel for Mendelian strokes
Source: PubMed Central journal article supplement — Stroke Vasc Neurol. 2020 Apr 26;5(4):416–21. doi: 10.1136/svn-2020-000352 (PMC7804056; doi:10.1136/svn-2020-000352), 2020-04-26
Supplement: svn-2020-000352supp004.pdf [file svn-2020-000352supp004.pdf]

| <b>Table S3 Gene list of panel</b>                      |                |                |                        |
|---------------------------------------------------------|----------------|----------------|------------------------|
| <b>Classification</b>                                   | <b>Gene</b>    | <b>OMIM ID</b> | <b>Number of genes</b> |
| Genes that harbor causal mutations for Mendelian stroke | <i>DOCK8</i>   | 611432         | 181                    |
|                                                         | <i>DYRK1B</i>  | 604556         |                        |
|                                                         | <i>HBB</i>     | 141900         |                        |
|                                                         | <i>ITPKC</i>   | 606476         |                        |
|                                                         | <i>MUT</i>     | 609058         |                        |
|                                                         | <i>PDE4D</i>   | 600129         |                        |
|                                                         | <i>SLC2A10</i> | 606145         |                        |
|                                                         | <i>TTR</i>     | 176300         |                        |
|                                                         | <i>CEP19</i>   | 615586         |                        |
|                                                         | <i>ENPP1</i>   | 173335         |                        |
|                                                         | <i>FBNI</i>    | 134797         |                        |
|                                                         | <i>MFAP5</i>   | 601103         |                        |
|                                                         | <i>MYH11</i>   | 160745         |                        |
|                                                         | <i>MYLK</i>    | 600922         |                        |
|                                                         | <i>PRKG1</i>   | 176894         |                        |
|                                                         | <i>ACTC1</i>   | 102540         |                        |
|                                                         | <i>ACTN2</i>   | 102573         |                        |
|                                                         | <i>ANK2</i>    | 106410         |                        |
|                                                         | <i>BAG3</i>    | 603883         |                        |
|                                                         | <i>CDKN1C</i>  | 600856         |                        |
|                                                         | <i>COL1A1</i>  | 120150         |                        |
|                                                         | <i>COL1A2</i>  | 120160         |                        |
|                                                         | <i>DES</i>     | 125660         |                        |
|                                                         | <i>DSG2</i>    | 125671         |                        |
|                                                         | <i>GATA4</i>   | 600576         |                        |
|                                                         | <i>GATA6</i>   | 601656         |                        |
|                                                         | <i>GATAD1</i>  | 614518         |                        |
|                                                         | <i>GDF1</i>    | 602880         |                        |
|                                                         | <i>GJA1</i>    | 121014         |                        |
|                                                         | <i>GJA5</i>    | 121013         |                        |
|                                                         | <i>HFE</i>     | 613609         |                        |
|                                                         | <i>JAG1</i>    | 601920         |                        |
|                                                         | <i>KCNA5</i>   | 176267         |                        |
| <i>KCNE1</i>                                            | 176261         |                |                        |
| <i>KCNE2</i>                                            | 603796         |                |                        |
| <i>KCNH2</i>                                            | 152427         |                |                        |
| <i>KCNJ2</i>                                            | 600681         |                |                        |
| <i>KCNJ5</i>                                            | 600734         |                |                        |
| <i>KCNQ1</i>                                            | 607542         |                |                        |
| <i>MYBPC3</i>                                           | 600958         |                |                        |

|                |        |
|----------------|--------|
| <i>NKX2-5</i>  | 600584 |
| <i>NPPA</i>    | 108780 |
| <i>NUP155</i>  | 606694 |
| <i>PGM1</i>    | 171900 |
| <i>PITX2</i>   | 601542 |
| <i>PRKARIA</i> | 188830 |
| <i>PROZ</i>    | 176895 |
| <i>PSEN1</i>   | 104311 |
| <i>PSEN2</i>   | 600759 |
| <i>RBM20</i>   | 613171 |
| <i>RYR2</i>    | 180902 |
| <i>SCN1B</i>   | 600235 |
| <i>SCN2B</i>   | 601327 |
| <i>SCN3B</i>   | 608214 |
| <i>SCN4B</i>   | 608256 |
| <i>SCN5A</i>   | 600163 |
| <i>TALDO1</i>  | 602063 |
| <i>TAZ</i>     | 300394 |
| <i>TBX1</i>    | 602054 |
| <i>TBX20</i>   | 606061 |
| <i>TCAP</i>    | 604488 |
| <i>TGFB3</i>   | 190230 |
| <i>TLL1</i>    | 606742 |
| <i>TTN</i>     | 188840 |
| <i>ZFPM2</i>   | 603693 |
| <i>CBS</i>     | 613381 |
| <i>MPL</i>     | 159530 |
| <i>RASA1</i>   | 139150 |
| <i>COL4A1</i>  | 120130 |
| <i>CTC1</i>    | 613129 |
| <i>CTSA</i>    | 613111 |
| <i>CYP27A1</i> | 606530 |
| <i>GLA</i>     | 300644 |
| <i>HTRA1</i>   | 602194 |
| <i>LAMP2</i>   | 309060 |
| <i>LIPC</i>    | 151670 |
| <i>NOS3</i>    | 163729 |
| <i>NOTCH3</i>  | 600276 |
| <i>PRNP</i>    | 176640 |
| <i>SLC19A2</i> | 603941 |
| <i>YYIAP1</i>  | 607860 |
| <i>ACTA2</i>   | 102620 |
| <i>BRCC3</i>   | 300617 |

|                 |        |
|-----------------|--------|
| <i>CBL</i>      | 165360 |
| <i>CCER2</i>    | 617634 |
| <i>GUCY1A3</i>  | 139396 |
| <i>MTCP1</i>    | 300116 |
| <i>NF1</i>      | 613113 |
| <i>RNF213</i>   | 613768 |
| <i>SHOC2</i>    | 602775 |
| <i>TGIF</i>     | 602630 |
| <i>B4GALT1</i>  | 137060 |
| <i>BMPR2</i>    | 600799 |
| <i>ETV6</i>     | 600618 |
| <i>F10</i>      | 613872 |
| <i>F13A1</i>    | 134570 |
| <i>F13B</i>     | 134580 |
| <i>F2</i>       | 176930 |
| <i>F3</i>       | 134390 |
| <i>F5</i>       | 612309 |
| <i>F7</i>       | 613878 |
| <i>F8</i>       | 300841 |
| <i>FGA</i>      | 134820 |
| <i>FGB</i>      | 134830 |
| <i>FGG</i>      | 134850 |
| <i>GGCX</i>     | 137167 |
| <i>GP1BA</i>    | 606672 |
| <i>GP6</i>      | 605546 |
| <i>ITGA2</i>    | 192974 |
| <i>ITGA2B</i>   | 607759 |
| <i>ITGB3</i>    | 173470 |
| <i>JAK2</i>     | 147796 |
| <i>MYH9</i>     | 160775 |
| <i>P2RY12</i>   | 600515 |
| <i>PIGA</i>     | 311770 |
| <i>PLA2G7</i>   | 601690 |
| <i>PROC</i>     | 612283 |
| <i>PROS1</i>    | 176880 |
| <i>RYR1</i>     | 180901 |
| <i>SERPINC1</i> | 107300 |
| <i>SERPIND1</i> | 142360 |
| <i>TBXA2R</i>   | 188070 |
| <i>THBD</i>     | 188040 |
| <i>VKORC1</i>   | 608547 |
| <i>VWF</i>      | 613160 |
| <i>PNP</i>      | 164050 |

|                |        |
|----------------|--------|
| <i>TMEM173</i> | 612374 |
| <i>LMBRD1</i>  | 612625 |
| <i>MMACHC</i>  | 609831 |
| <i>MTHFR</i>   | 607093 |
| <i>MTR</i>     | 156570 |
| <i>TCN1</i>    | 189905 |
| <i>ABCA1</i>   | 600046 |
| <i>APOA1</i>   | 107680 |
| <i>APOA5</i>   | 606368 |
| <i>CETP</i>    | 118470 |
| <i>EPHX2</i>   | 132811 |
| <i>LDLR</i>    | 606945 |
| <i>LMNA</i>    | 150330 |
| <i>LPL</i>     | 609708 |
| <i>MTPP</i>    | 157147 |
| <i>POLD1</i>   | 174761 |
| <i>PRKAG2</i>  | 602743 |
| <i>ABCC6</i>   | 603234 |
| <i>ACVRL1</i>  | 601284 |
| <i>APP</i>     | 104760 |
| <i>ATP7A</i>   | 300011 |
| <i>CCM2</i>    | 607929 |
| <i>COL3A1</i>  | 120180 |
| <i>COL4A2</i>  | 120090 |
| <i>COL5A1</i>  | 120215 |
| <i>CPT2</i>    | 600650 |
| <i>CST3</i>    | 604312 |
| <i>ELN</i>     | 130160 |
| <i>ENG</i>     | 131195 |
| <i>FLCN</i>    | 607273 |
| <i>GDF2</i>    | 605120 |
| <i>GSN</i>     | 137350 |
| <i>ITM2B</i>   | 603904 |
| <i>KIF1B</i>   | 605995 |
| <i>KRAS</i>    | 190070 |
| <i>KRIT1</i>   | 604214 |
| <i>MTRR</i>    | 602568 |
| <i>PCNT</i>    | 605925 |
| <i>PDCD10</i>  | 609118 |
| <i>PHACTR1</i> | 608723 |
| <i>PKD1</i>    | 601313 |
| <i>PKD2</i>    | 173910 |
| <i>PLAU</i>    | 191840 |

|                                  |                 |        |     |
|----------------------------------|-----------------|--------|-----|
|                                  | <i>PLOD3</i>    | 603066 |     |
|                                  | <i>RET</i>      | 164761 |     |
|                                  | <i>SMAD3</i>    | 603109 |     |
|                                  | <i>SMAD4</i>    | 600993 |     |
|                                  | <i>SMARCAL1</i> | 606622 |     |
|                                  | <i>STIM1</i>    | 605921 |     |
|                                  | <i>TGFB2</i>    | 190220 |     |
|                                  | <i>TGFBR1</i>   | 190181 |     |
|                                  | <i>TGFBR2</i>   | 190182 |     |
|                                  | <i>TREX1</i>    | 606609 |     |
|                                  | <i>VHL</i>      | 608537 |     |
|                                  | <i>CECR1</i>    | 607575 |     |
| Stroke risk factor-related genes | <i>ABCG5</i>    | 605459 | 107 |
|                                  | <i>ABCG8</i>    | 605460 |     |
|                                  | <i>ANGPTL3</i>  | 604774 |     |
|                                  | <i>ANGPTL4</i>  | 605910 |     |
|                                  | <i>APOA2</i>    | 107670 |     |
|                                  | <i>APOA4</i>    | 107690 |     |
|                                  | <i>APOB</i>     | 107730 |     |
|                                  | <i>APOC2</i>    | 608083 |     |
|                                  | <i>APOC3</i>    | 107720 |     |
|                                  | <i>APOE</i>     | 107741 |     |
|                                  | <i>EDN1</i>     | 131240 |     |
|                                  | <i>G6PD</i>     | 305900 |     |
|                                  | <i>GPIHBP1</i>  | 612757 |     |
|                                  | <i>HCFC1</i>    | 300019 |     |
|                                  | <i>LRP1</i>     | 107770 |     |
|                                  | <i>LRP6</i>     | 603507 |     |
|                                  | <i>OLR1</i>     | 602601 |     |
|                                  | <i>SCARB1</i>   | 601040 |     |
|                                  | <i>ZMPSTE24</i> | 606480 |     |
|                                  | <i>ABCD4</i>    | 603214 |     |
|                                  | <i>CUBN</i>     | 602997 |     |
|                                  | <i>MMADHC</i>   | 611935 |     |
|                                  | <i>ABCC9</i>    | 601439 |     |
|                                  | <i>AKAP9</i>    | 604001 |     |
|                                  | <i>ALG1</i>     | 605907 |     |
|                                  | <i>ALG11</i>    | 613666 |     |
|                                  | <i>ALG12</i>    | 607144 |     |
|                                  | <i>ALG13</i>    | 300776 |     |
| <i>ALG2</i>                      | 607905          |        |     |
| <i>ALG3</i>                      | 608750          |        |     |
| <i>ALG6</i>                      | 604566          |        |     |

|                |        |
|----------------|--------|
| <i>ALG8</i>    | 608103 |
| <i>ALG9</i>    | 606941 |
| <i>CACNA1C</i> | 114205 |
| <i>CALM1</i>   | 114180 |
| <i>CALM2</i>   | 114182 |
| <i>CALR3</i>   | 611414 |
| <i>CASQ2</i>   | 114251 |
| <i>CAV3</i>    | 601253 |
| <i>CRYAB</i>   | 123590 |
| <i>CSRP3</i>   | 600824 |
| <i>CTNNA3</i>  | 607667 |
| <i>DMD</i>     | 300377 |
| <i>DSC2</i>    | 125645 |
| <i>DSP</i>     | 125647 |
| <i>ECE1</i>    | 600423 |
| <i>EYA4</i>    | 603550 |
| <i>FKTN</i>    | 607440 |
| <i>FLNA</i>    | 300017 |
| <i>FLNC</i>    | 102565 |
| <i>JPH2</i>    | 605267 |
| <i>JUP</i>     | 173325 |
| <i>LAMA4</i>   | 600133 |
| <i>LDB3</i>    | 605906 |
| <i>MASP1</i>   | 600521 |
| <i>MYH6</i>    | 160710 |
| <i>MYH7</i>    | 160760 |
| <i>MYL2</i>    | 160781 |
| <i>MYL3</i>    | 160790 |
| <i>MYOZ2</i>   | 605602 |
| <i>MYPN</i>    | 608517 |
| <i>NEXN</i>    | 613121 |
| <i>NOTCH2</i>  | 600275 |
| <i>PKP2</i>    | 602861 |
| <i>PLN</i>     | 172405 |
| <i>PRDM16</i>  | 605557 |
| <i>RAF1</i>    | 164760 |
| <i>SGCD</i>    | 601411 |
| <i>SNTA1</i>   | 601017 |
| <i>TMEM43</i>  | 612048 |
| <i>TMPO</i>    | 188380 |
| <i>TNNC1</i>   | 191040 |
| <i>TNNI3</i>   | 191044 |
| <i>TNNT2</i>   | 191045 |

|                                              |                |        |    |
|----------------------------------------------|----------------|--------|----|
|                                              | <i>TPMI</i>    | 191010 |    |
|                                              | <i>TRDN</i>    | 603283 |    |
|                                              | <i>VCL</i>     | 193065 |    |
|                                              | <i>ACE</i>     | 106180 |    |
|                                              | <i>ATP1B1</i>  | 182330 |    |
|                                              | <i>EPOR</i>    | 133171 |    |
|                                              | <i>NOS2A</i>   | 600423 |    |
|                                              | <i>NR3C1</i>   | 138040 |    |
|                                              | <i>PDE3A</i>   | 123805 |    |
|                                              | <i>PTGIS</i>   | 601699 |    |
|                                              | <i>CISD2</i>   | 611507 |    |
|                                              | <i>HNF4A</i>   | 600281 |    |
|                                              | <i>IRS1</i>    | 147545 |    |
|                                              | <i>PPARG</i>   | 601487 |    |
|                                              | <i>VEGFA</i>   | 192240 |    |
|                                              | <i>ACAD9</i>   | 611103 |    |
|                                              | <i>PUS1</i>    | 608109 |    |
|                                              | <i>SDHD</i>    | 602690 |    |
|                                              | <i>YARS2</i>   | 610957 |    |
|                                              | <i>IL6</i>     | 147620 |    |
|                                              | <i>MAX</i>     | 154950 |    |
|                                              | <i>TMEM127</i> | 613403 |    |
|                                              | <i>XYLT1</i>   | 608124 |    |
|                                              | <i>XYLT2</i>   | 608125 |    |
|                                              | <i>BBOX1</i>   | 603312 |    |
|                                              | <i>CYP3A5</i>  | 605325 |    |
|                                              | <i>FHL5</i>    | 605126 |    |
|                                              | <i>FMO3</i>    | 136132 |    |
|                                              | <i>GNB3</i>    | 139130 |    |
|                                              | <i>IL1RN</i>   | 147679 |    |
|                                              | <i>LEPR</i>    | 601007 |    |
|                                              | <i>RGS5</i>    | 603276 |    |
|                                              | <i>SELE</i>    | 131210 |    |
| Genes associated with disease susceptibility | <i>FGF23</i>   | 605380 | 5  |
|                                              | <i>LOX</i>     | 153455 |    |
|                                              | <i>PRKCH</i>   | 605437 |    |
|                                              | <i>ADAMTS1</i> | 605174 |    |
|                                              | <i>CDKN2A</i>  | 600160 |    |
| Drug metabolism-related genes                | <i>ABCB1</i>   | 171050 | 11 |
|                                              | <i>AGT</i>     | 106150 |    |
|                                              | <i>CYP2C19</i> | 124020 |    |
|                                              | <i>CYP2C9</i>  | 601130 |    |
|                                              | <i>CYP4F2</i>  | 604426 |    |

|                                            |                 |        |     |
|--------------------------------------------|-----------------|--------|-----|
|                                            | <i>CYP19A1</i>  | 107910 |     |
|                                            | <i>KIF6</i>     | 613919 |     |
|                                            | <i>LTC4S</i>    | 246530 |     |
|                                            | <i>MAGT1</i>    | 300715 |     |
|                                            | <i>PTGS1</i>    | 176805 |     |
|                                            | <i>SLCO1B1</i>  | 604843 |     |
|                                            | <i>ABCC2</i>    | 601107 |     |
|                                            | <i>ASXL1</i>    | 612990 |     |
|                                            | <i>COG1</i>     | 606973 |     |
|                                            | <i>COG4</i>     | 606976 |     |
|                                            | <i>COG5</i>     | 606821 |     |
|                                            | <i>COG6</i>     | 606977 |     |
|                                            | <i>COG7</i>     | 606978 |     |
|                                            | <i>COG8</i>     | 606979 |     |
|                                            | <i>COLEC11</i>  | 612502 |     |
|                                            | <i>DDOST</i>    | 602202 |     |
|                                            | <i>DOLK</i>     | 610746 |     |
|                                            | <i>DPAGT1</i>   | 191350 |     |
|                                            | <i>DPM1</i>     | 603503 |     |
|                                            | <i>DPM2</i>     | 603564 |     |
|                                            | <i>DPM3</i>     | 605951 |     |
|                                            | <i>DVL1</i>     | 601365 |     |
|                                            | <i>FERMT1</i>   | 607900 |     |
|                                            | <i>HOXA1</i>    | 142955 |     |
| Other genes designated by the expert group | <i>MOGS</i>     | 601336 | 142 |
|                                            | <i>MPDU1</i>    | 604041 |     |
|                                            | <i>PMM2</i>     | 601785 |     |
|                                            | <i>RECQL4</i>   | 603780 |     |
|                                            | <i>RFT1</i>     | 611908 |     |
|                                            | <i>RNASEH2A</i> | 606034 |     |
|                                            | <i>RNASEH2B</i> | 610326 |     |
|                                            | <i>RNASEH2C</i> | 610330 |     |
|                                            | <i>ROR2</i>     | 602337 |     |
|                                            | <i>SBF2</i>     | 607697 |     |
|                                            | <i>SLC35A1</i>  | 605634 |     |
|                                            | <i>SLC35C1</i>  | 605881 |     |
|                                            | <i>SLC37A4</i>  | 602671 |     |
|                                            | <i>SRD5A3</i>   | 611715 |     |
|                                            | <i>TMEM165</i>  | 614726 |     |
|                                            | <i>WFS1</i>     | 606201 |     |
|                                            | <i>WNT5A</i>    | 164975 |     |
|                                            | <i>AGXT</i>     | 604285 |     |
|                                            | <i>ALPL</i>     | 171760 |     |



|                |        |
|----------------|--------|
| <i>ASS1</i>    | 603470 |
| <i>FOLR1</i>   | 136430 |
| <i>MPO</i>     | 606989 |
| <i>NCF1</i>    | 608512 |
| <i>OTC</i>     | 300461 |
| <i>PEPD</i>    | 613230 |
| <i>POR</i>     | 124015 |
| <i>TCN2</i>    | 613441 |
| <i>BEST1</i>   | 607854 |
| <i>FSHB</i>    | 136530 |
| <i>ITGB6</i>   | 147558 |
| <i>LBR</i>     | 600024 |
| <i>MGAT2</i>   | 602616 |
| <i>MICU1</i>   | 605084 |
| <i>NTRK1</i>   | 191315 |
| <i>OTOG</i>    | 604487 |
| <i>PORCN</i>   | 300651 |
| <i>SNX10</i>   | 614780 |
| <i>SOD1</i>    | 147450 |
| <i>SOX17</i>   | 610928 |
| <i>SPTB</i>    | 182870 |
| <i>TGFB1</i>   | 190180 |
| <i>THRA</i>    | 190120 |
| <i>TUSC3</i>   | 601385 |
| <i>UVSSA</i>   | 614632 |
| <i>DDB2</i>    | 600811 |
| <i>XPA</i>     | 611153 |
| <i>XPC</i>     | 613208 |
| <i>ARFGEF2</i> | 605371 |
| <i>ISCU</i>    | 611911 |
| <i>PCDH19</i>  | 300460 |
| <i>SDHAF2</i>  | 613019 |
| <i>TBXAS1</i>  | 274180 |
| <i>TSC1</i>    | 605284 |
| <i>ATM</i>     | 607585 |
| <i>ATR</i>     | 601215 |
| <i>MRE11</i>   | 600814 |
| <i>PCNA</i>    | 176740 |
| <i>SOX18</i>   | 601618 |
| <i>ABO</i>     | 110300 |
| <i>ADAMTS4</i> | 603876 |
| <i>ADGRV1</i>  | 602851 |
| <i>AGTR1</i>   | 106165 |

|                 |        |
|-----------------|--------|
| <i>ALOX5AP</i>  | 603700 |
| <i>AMPD1</i>    | 102770 |
| <i>ARMS2</i>    | 611313 |
| <i>CFHR4</i>    | 605337 |
| <i>ENOX1</i>    | 610914 |
| <i>FOXE3</i>    | 601094 |
| <i>HPSE2</i>    | 613469 |
| <i>JPH3</i>     | 605268 |
| <i>KCTD2</i>    | 613422 |
| <i>PNPLA2</i>   | 609059 |
| <i>PONI</i>     | 168820 |
| <i>PRIM2</i>    | 176636 |
| <i>REST</i>     | 600571 |
| <i>SERPINA1</i> | 107400 |
| <i>TRESK</i>    | 613655 |
| <i>YAPI</i>     | 606608 |
| <i>MOK</i>      | 605762 |
| <i>ANXA1</i>    | 151690 |
| <i>MSR1</i>     | 153622 |
| <i>ORM1</i>     | 138600 |
| <i>PDE4DIP</i>  | 608117 |
| <i>ABHD5</i>    | 604780 |
| <i>ADAMTS13</i> | 604134 |
| <i>ADAMTS2</i>  | 604539 |
| <i>ADAR</i>     | 146920 |
| <i>ATP1A2</i>   | 182340 |
| <i>BLM</i>      | 604610 |
| <i>CACNA1A</i>  | 601011 |
| <i>CLCN2</i>    | 600570 |
| <i>CNNM2</i>    | 607803 |
| <i>COQ2</i>     | 609825 |
| <i>CSF1R</i>    | 164770 |
| <i>DARS2</i>    | 610956 |
| <i>DDHD1</i>    | 614603 |
| <i>ECM1</i>     | 602201 |
| <i>EDNRA</i>    | 131243 |
| <i>EIF2B1</i>   | 606686 |
| <i>EIF2B2</i>   | 606454 |
| <i>EIF2B3</i>   | 606273 |
| <i>EIF2B4</i>   | 606687 |
| <i>EIF2B5</i>   | 603945 |
| <i>ERCC2</i>    | 126340 |
| <i>ERCC6</i>    | 609413 |

|                |        |
|----------------|--------|
| <i>ERCC8</i>   | 609412 |
| <i>ERMARD</i>  | 615532 |
| <i>FH</i>      | 136850 |
| <i>GAA</i>     | 606800 |
| <i>GATM</i>    | 602360 |
| <i>IFIH1</i>   | 606951 |
| <i>PDGFB</i>   | 190040 |
| <i>PDGFRB</i>  | 173410 |
| <i>PRRT2</i>   | 614386 |
| <i>RBBP8</i>   | 604124 |
| <i>SAMHD1</i>  | 606754 |
| <i>SCP2</i>    | 184755 |
| <i>SDHA</i>    | 600857 |
| <i>SDHB</i>    | 185470 |
| <i>SDHC</i>    | 602413 |
| <i>SLC20A2</i> | 158378 |
| <i>TREM2</i>   | 605086 |
| <i>TYROBP</i>  | 604142 |
| <i>XPRI</i>    | 605237 |
